# Supplementary material for: EHR Implementation and Financial Performance: The Case of Under-Resourced (High Medicaid) Nursing Homes
Source: Research Square preprint supplement (doi:10.21203/rs.3.rs-1281662/v1), 2022-02-02
Supplement: Supplementary file 1 [file 0d83483e50fb5638dd422322.docx]

**Appendix A.** **Electronic Health Records (EHR) Functionalities and Components**

| **EHR Functionalities** |  | **Components** | **Mean (SD)** | **Cronbach’s Alpha** |
| --- | --- | --- | --- | --- |
| **Administration** |  | Minimum Data Set  Assessments for Residents, Protocols, Care Area  Financial Management  Quality Improvement and Reporting  Patient Care Planning  Task List | 1.80 (0.41)  1.36 (0.77)  1.42 (0.57)  1.02 (0.66)  1.35 (0.71)  1.08 (0.88) | 0.82 |
| **Documentation** |  | Patient Demographics  Advance Directives  Medical History  Clinical Notes  Problem List  Allergy List  Medication Administration Record  Treatment Administration Record  Summary Reports (Transfer, Discharge, Consult) | 1.51 (0.61)  0.70 (0.67)  0.90 (0.73)  1.19 (0.82)  1.17 (0.82)  1.37 (0.71)  1.24 (0.89)  1.22 (0.89)  1.04 (0.73) | 0.92 |
| **Orders** |  | Medication Order Entry  Other Order Entry | 1.24 (0.82)  1.23 (0.79) | 0.95 |
| **Results Viewing** |  | Labs  Radiology  Diagnostic Tests  Consults | 0.94 (0.66)  0.87 (0.69)  0.79 (0.66)  0.66 (0.64) | 0.90 |
| **Clinical Tools** |  | Clinical Decision Support  Telemonitoring / telehealth | 0.91 (0.72)  0.96 (0.77) | 0.91 |
